# Supplementary material
Source: PubMed Central journal article supplement (PMC3390174)

## **SUPPORTING INFORMATION Kim et al.**

### **MATERIALS AND METHODS**

#### **Size Exclusion Chromatography for WT and L834R mutant EGFR**

Size exclusion chromatography (Superdex 200) was used to examine the oligomeric state of WT and L834R MT EGFR. Flag-affinity purified EGFR was concentrated to ~25-80  $\mu$ M and loaded onto Superdex 200 10/300 (GE Healthcare, Piscataway, NJ) using ACTA Purifier FPLC system (GE Healthcare, Piscataway, NJ). Column was equilibrated with a buffer containing 50mM TrisCl (pH 7.4), 150 mM NaCl<sub>2</sub>, 0.01 % Tween-20. Flow-rate was 0.4 mL/min. Absorbance at 280 nm was monitored and elution peaks were analyzed by SDS-PAGE. Standard curve was generated using BSA and ovalbumin (BSA2: BSA dimer, BSA1: BSA monomer, Ova2: Ovalbumin dimer, Ova1: Ovalbumin monomer).

#### **Expression and purification of his-tagged EGFR**

To prepare his-tagged EGFR, DNA encoding residues 672-1186 of human EGFR was cloned into pFAST BAC HT (Invitrogen) which contains an N-terminal 6-His tag. Recombinant bacmid were transfected into *Sf9* cells to produce recombinant baculovirus which were used to infect *Sf9* cells for protein expression. The supernatant containing his-tagged EGFR was prepared as flag-tagged EGFR and loaded onto Ni-NTA-agarose resin (Quiagen). After washing with buffer containing 50mM Tris-HCl (pH 7.4), 150 mM NaCl, 10% glycerol, 20 mM imidazole extensively, the protein was eluted in 500 mM imidazole. Superdex 200 10/300 was used as a final purification step as in Experimental Procedures.

#### **Preparation of small unilamellar vesicles and autophosphorylation assay of EGFR on vesicles**

Homogeneous small unilamellar vesicles were prepared from DOPC and DOGS-NTA-Ni according to Zhang et al (3). His-tagged wild type EGFR was mixed with vesicles containing 5 mole percent of DOGS-NTA-Ni. The final concentration of EGFR and DOGS-NTA-Ni in the assay was 3.5  $\mu$ M and 12.5  $\mu$ M, respectively. EGFR on vesicle was used for radiolabeled autophosphorylation assay as described in Experimental Procedures in the paper and the activity was compared to the EGFR in solution. The same concentration of EGFR in the absence of vesicles was assayed as a control. Phosphorylated EGFR was quantified as in Experimental Procedures.

**Identification of Tyrosine Phosphorylation Sites by ESI LC-MS/MS.** Phosphorylated EGFR quenched at different reaction times was subjected to trypsin and/or glutamic-C digestion according to manufacturer's protocol. We used a 5:1 ratio of enzyme to trypsin to ensure more than 90% proteolytic coverage. The reaction was performed in 100 mM NH<sub>4</sub>HCO<sub>3</sub>, pH 7.8 overnight at 37 °C. The digested peptides were separated on a reverse phase column (Aquasil C18 column (100x4.6 mm, 3 $\mu$ m), Thermo Scientific, Waltham, MA) using a Shimadzu HPLC (Shimadzu, Norwell, MA) coupled to a Finnigan LCQ DECA ESI-ion trap mass spectrometer (Thermo Scientific, Waltham, MA). A 60 min

linear gradient was used (Solvent A: 0.1% Formic acid, 0.01% TFA in water; Solvent B: 0.1% Formic acid, 0.01% TFA in 50% ACN). The elution was performed with a flow rate of 0.2 ml/min. The peptides eluted from the column were detected and fragmented in an automated fashion using data dependent analysis in the positive ion mode. The spray voltage was kept at 5 kV and the capillary temperature at 250 °C. The sheath gas (nitrogen) was set at 60 units. Peptide identification was done using the software Bioworks 3.1 (Thermo Scientific, Waltham, MA). Peptides with Xcorr value of over 1.0 were confirmed as true signal. Representative spectra for peptide LC/MS identification and MS/MS fragmentation to determine peptide sequence and site of tyrosine phosphorylation are illustrated in Figure S4A-H.

**Figure S1.** Size Exclusion Chromatography for (A) WT and (B) L834R MT EGFR. (C) Standard curve using BSA and Ovalbumin (BSA2: BSA dimer, BSA1: BSA monomer, Ova2: Ovalbumin dimer, Ova1: Ovalbumin monomer). (D) Data from SEC-LS.

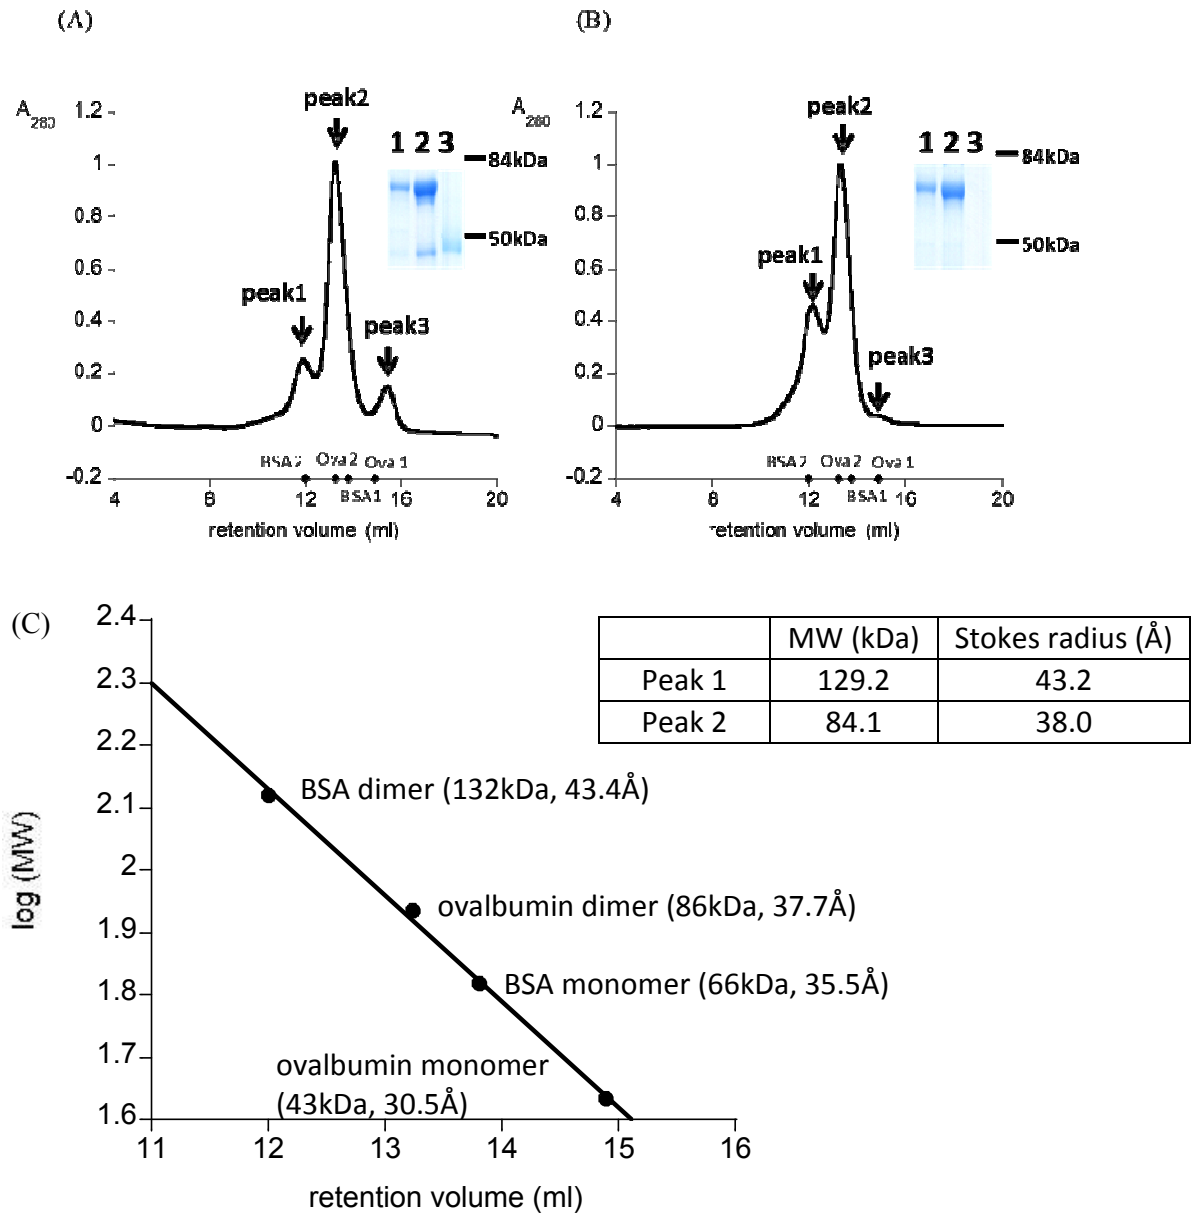

**(D) Data from SEC-LS**

| WT     | Retention volume (ml) | MW(kDa) calculated by ASTRA | MW for monomer (kDa) | L834R  | Retention volume (ml) | MW(kDa) calculated by ASTRA | MW for monomer (kDa) |
|--------|-----------------------|-----------------------------|----------------------|--------|-----------------------|-----------------------------|----------------------|
| Peak 1 | 12.1                  | 135                         | 60                   | Peak 1 | 12.1                  | 130                         | 60                   |
| Peak 2 | 13.2                  | 66.2                        | 60                   | Peak 2 | 13.3                  | 68.7                        | 60                   |
| Peak 3 | 14.9                  | 36.5                        | -                    |        |                       |                             |                      |

**Figure S2.** Concentration dependency of WT (A) and L834R (B) EGFR. Wild type or L834R EGFR was autophosphorylated in the presence of  $\gamma$ - $^{32}$ P-ATP and  $\text{MnCl}_2$ . The incorporation of radiolabeled ATP to EGFR was quantified using Molecular Imager FX and plotted against increasing times. Data were fitted to equation 1 (Materials and Methods) to determine the rate of autophosphorylation.

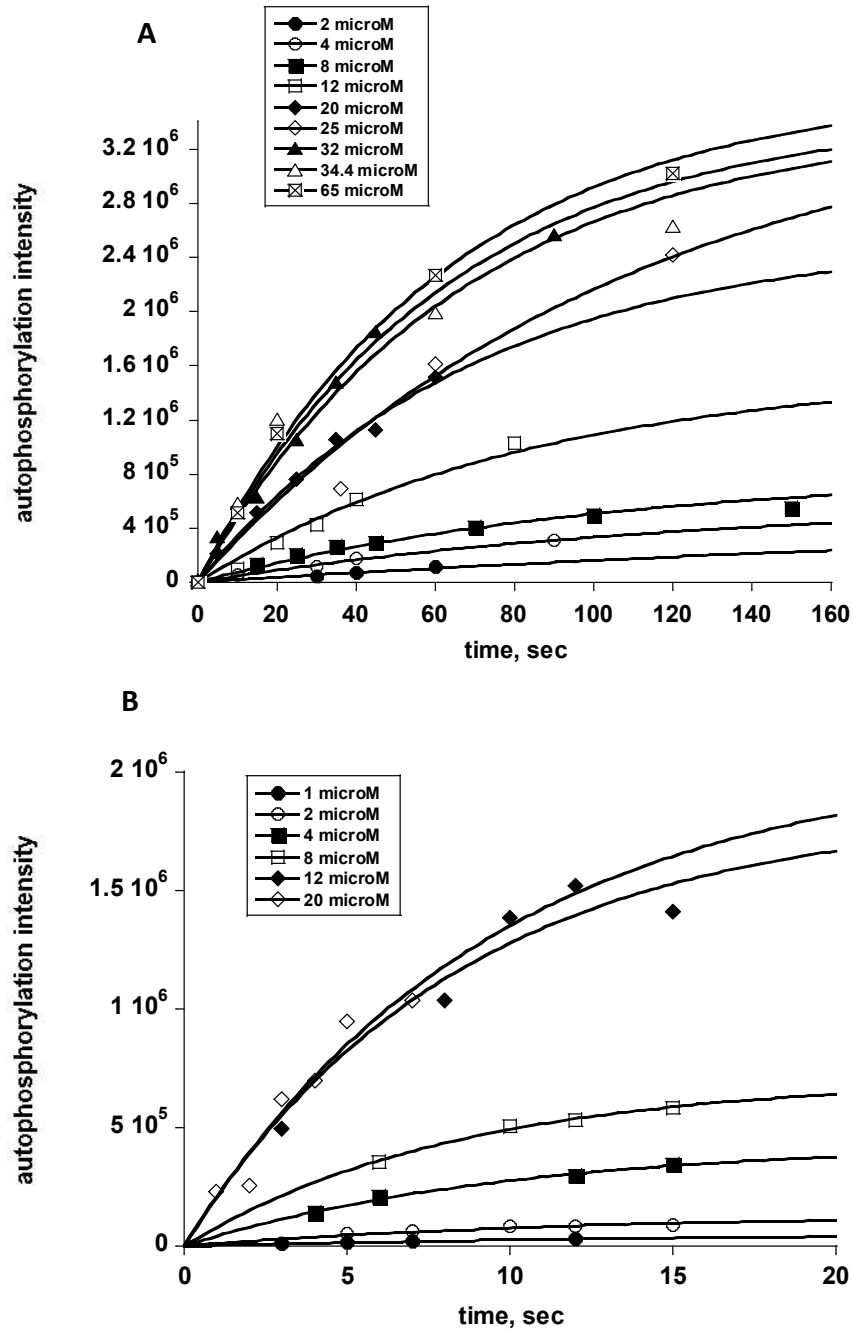

**Figure S3.** Rate of WT EGFR autophosphorylation on vesicles. Wild type EGFR was phosphorylated on vesicle in the presence of  $\gamma$ - $^{32}\text{P}$ -ATP and  $\text{MnCl}_2$ . Final concentration of EGFR and DOGS-NTA-Ni were  $3.5\ \mu\text{M}$  and  $12.5\ \mu\text{M}$ , respectively. The incorporation of radiolabeled ATP to EGFR was quantified using Molecular Imager FX and plotted against increasing times. Data were fitted to equation 1 (Materials and Methods) to determine the rate of autophosphorylation.

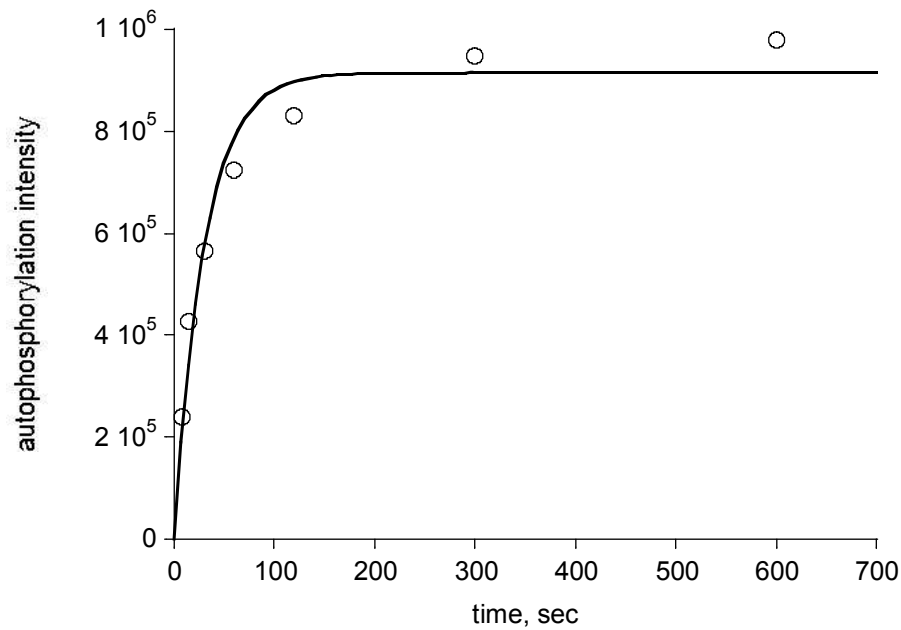

Fig S4A-H. Identification of Tyrosine Phosphorylation Sites by ESI LC-MS/MS

Fig. S4A.

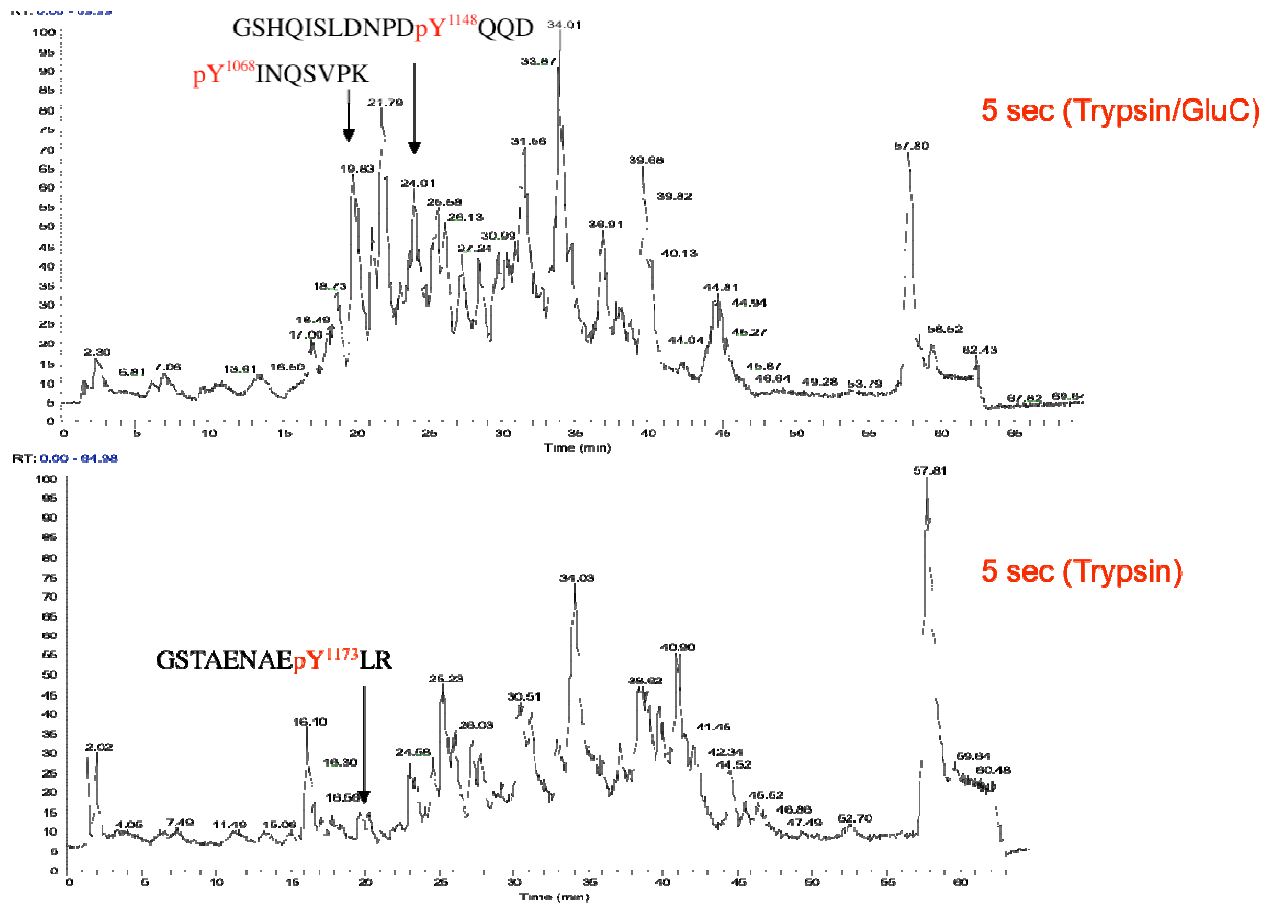

Fig. S4B.

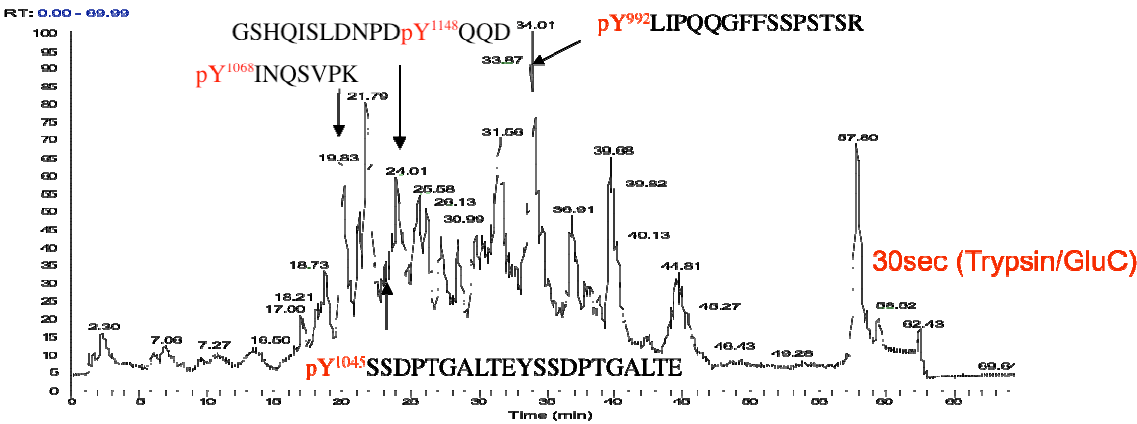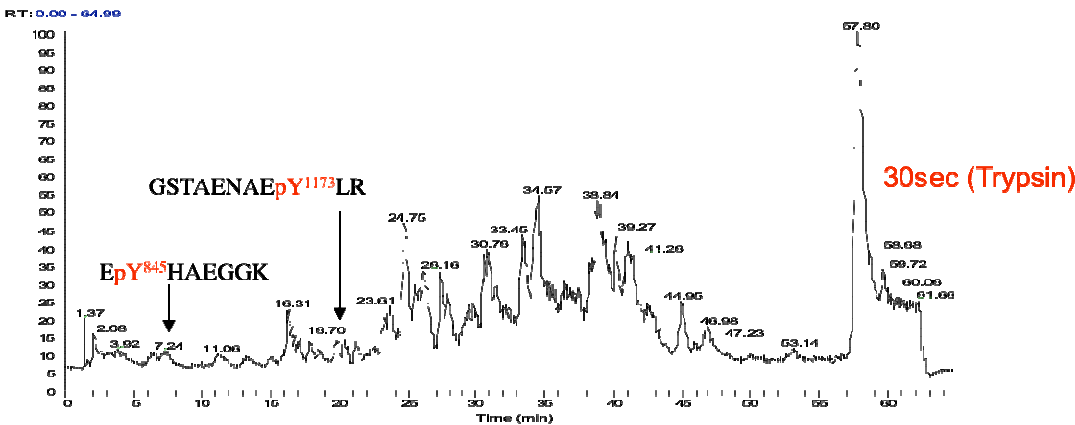

Fig. S4C.

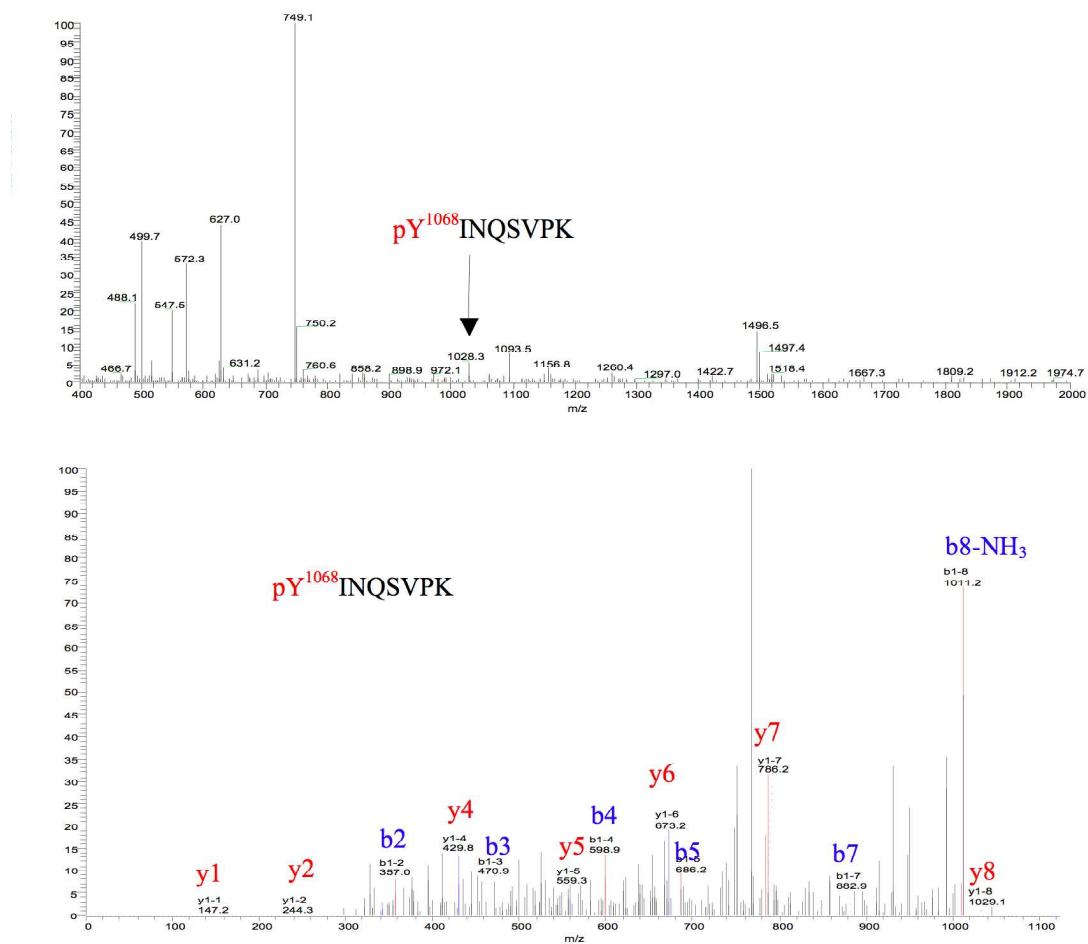

Fig. S4D.

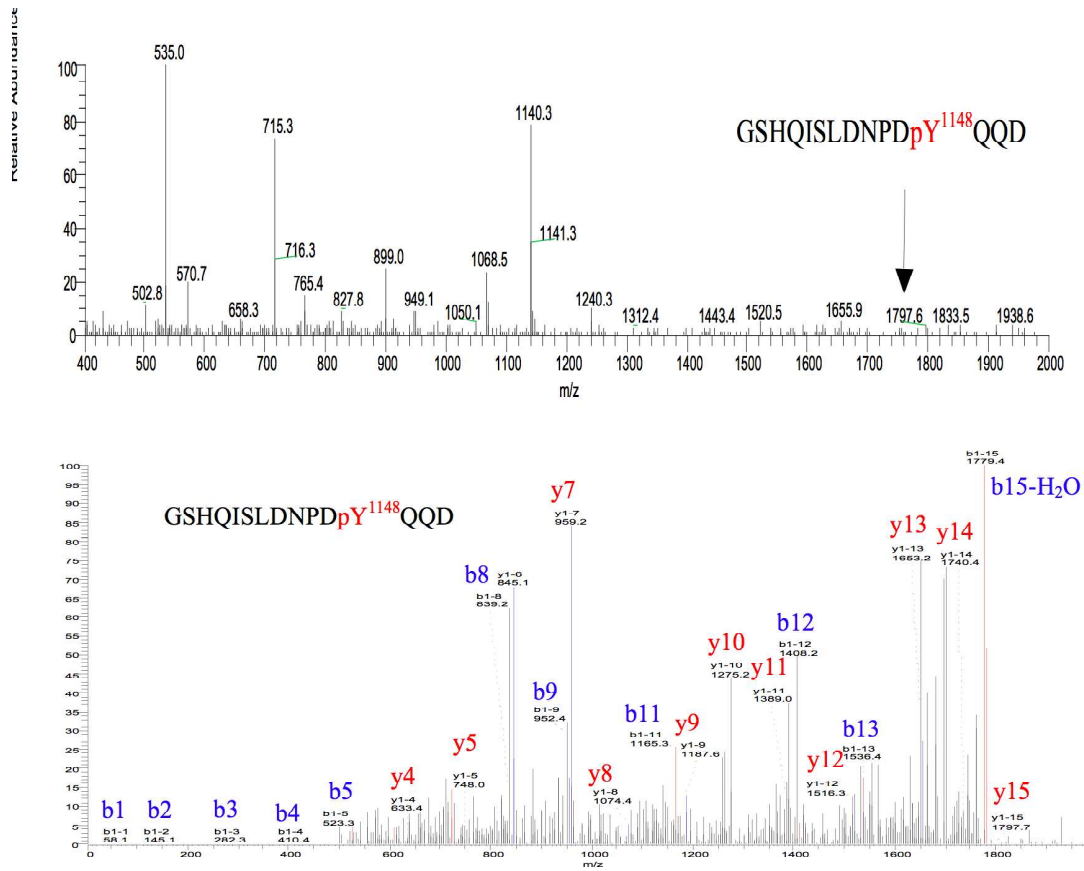

Fig. S4E.

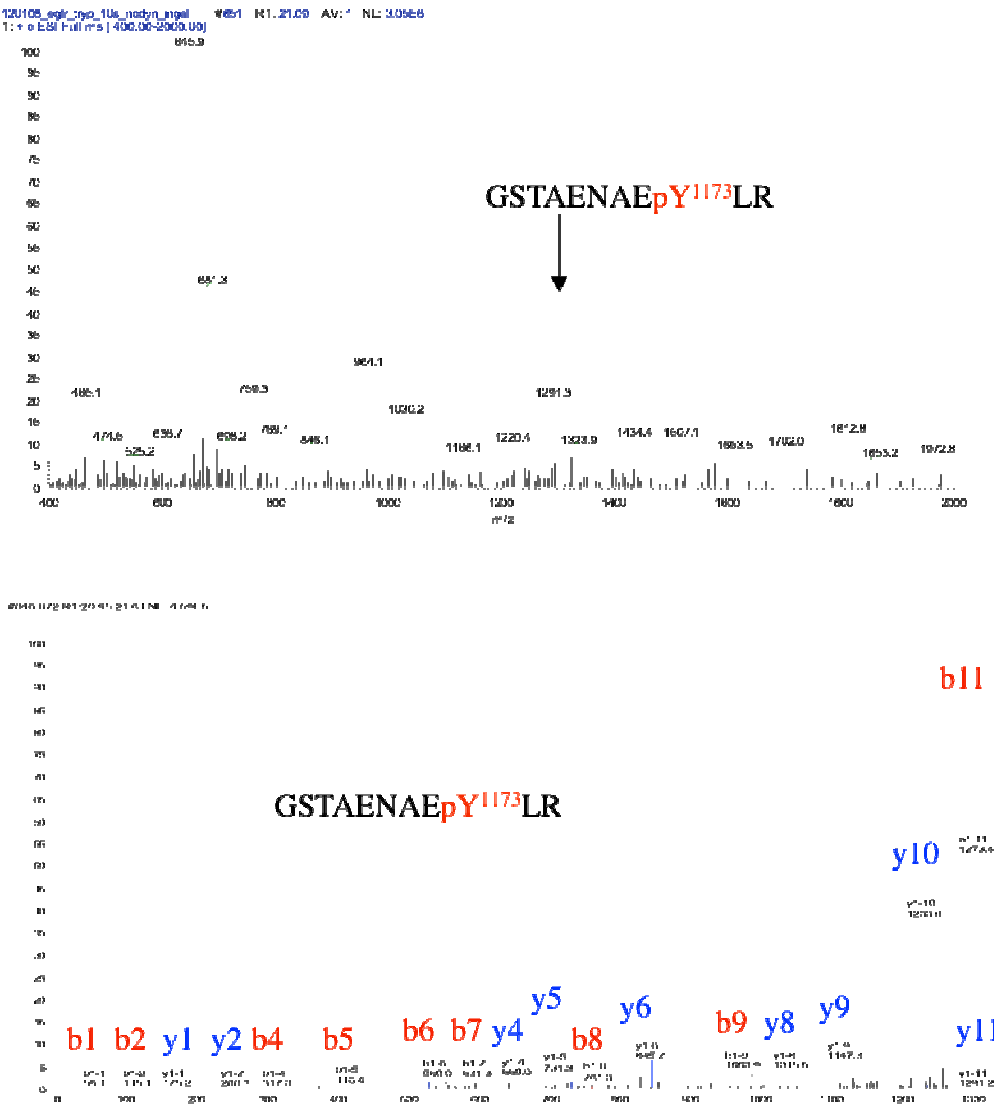

Fig. S4F.

111708\_sglr\_lyse\_gly\_30s\_modrn\_lhgsi #1344 RT: 33.67 AV:1 NL: 2.93E5  
T: + c d Full ms2 1693.04(35.00) 910.00-2000.00

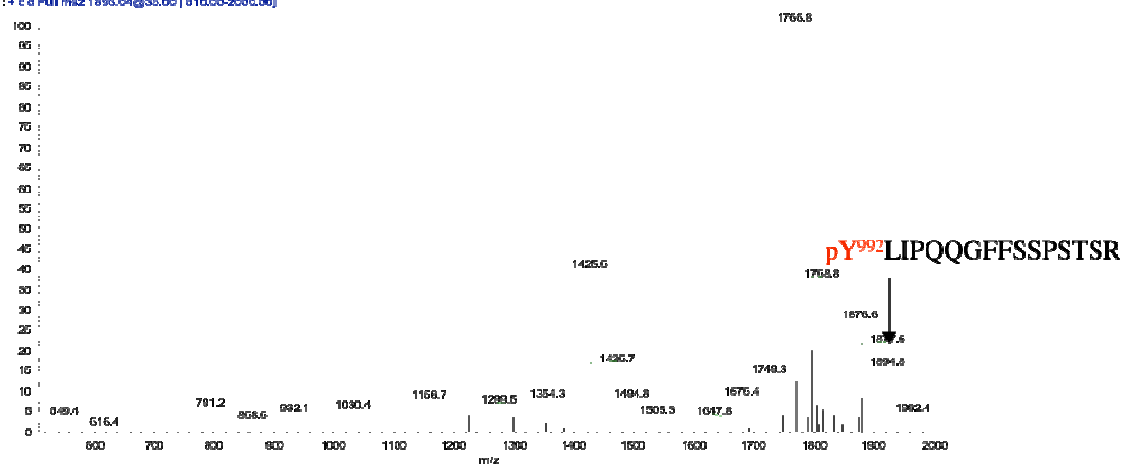

#1.350-1360 RT: 34.03-34.03 NL: 1.44E5

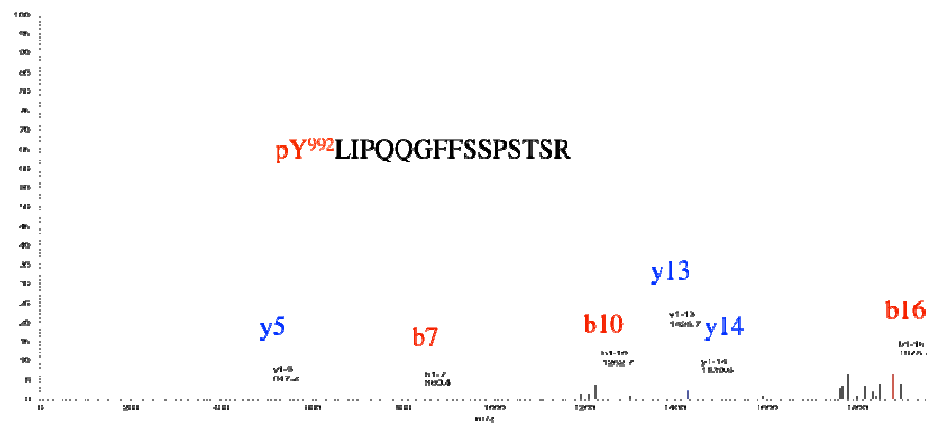

Fig. S4G.

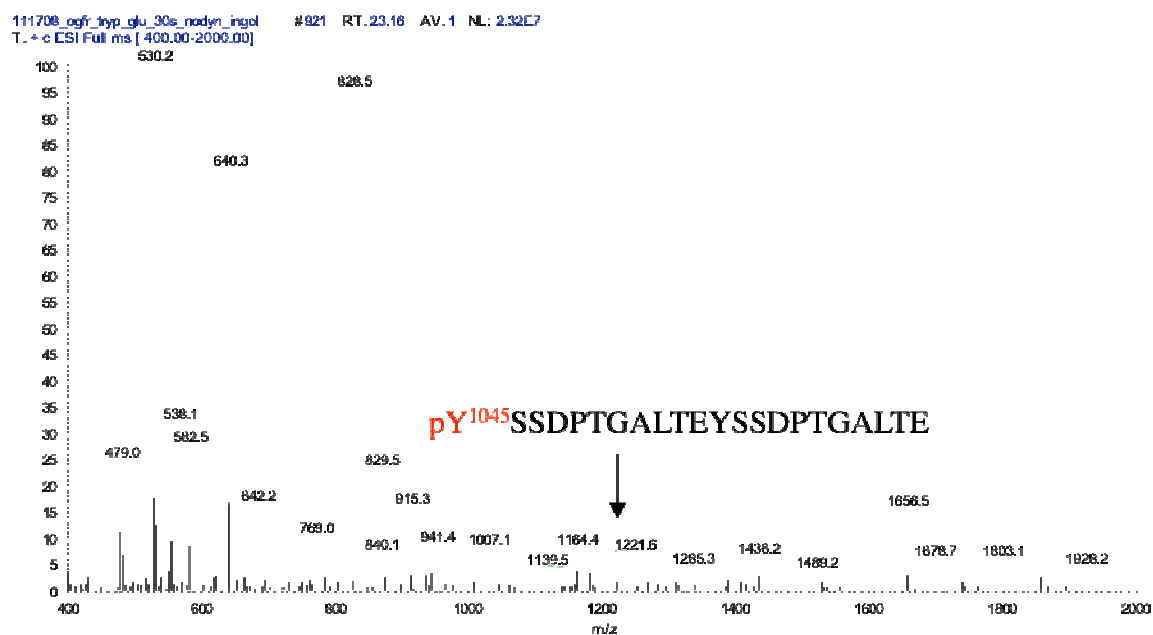

#904-910 RT: 22.77-23.03 NL: 8.40E4

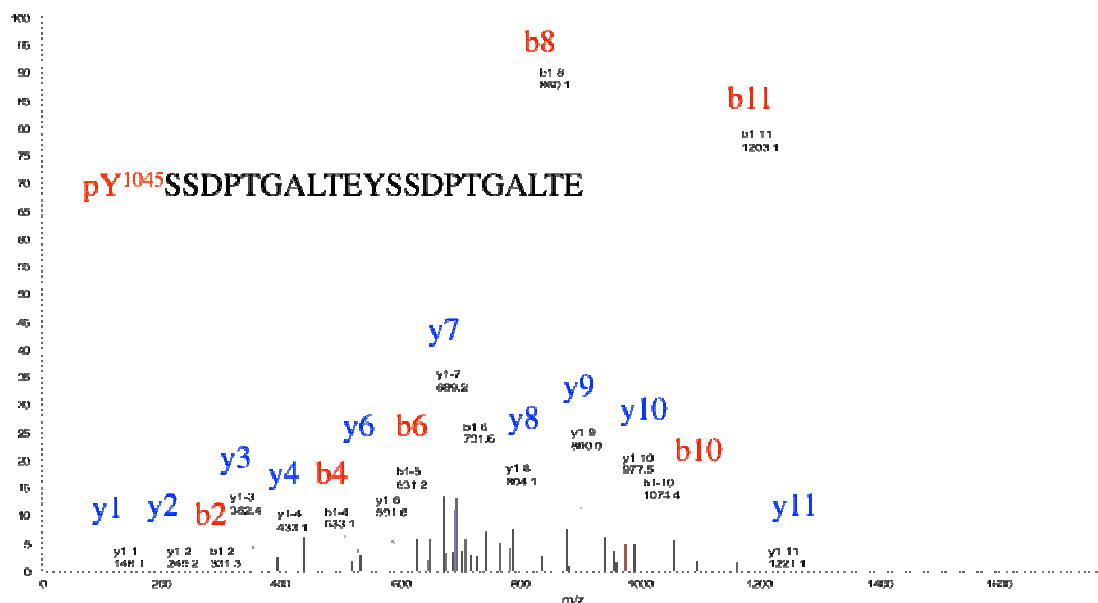

Fig. S4H.

120109\_eqlr\_tryp\_20a\_nodm\_incl #277 RT: 7.13 AV: 1 NL: 1.80EE  
T: + s ESI Full ms [ 400.00-2000.00]

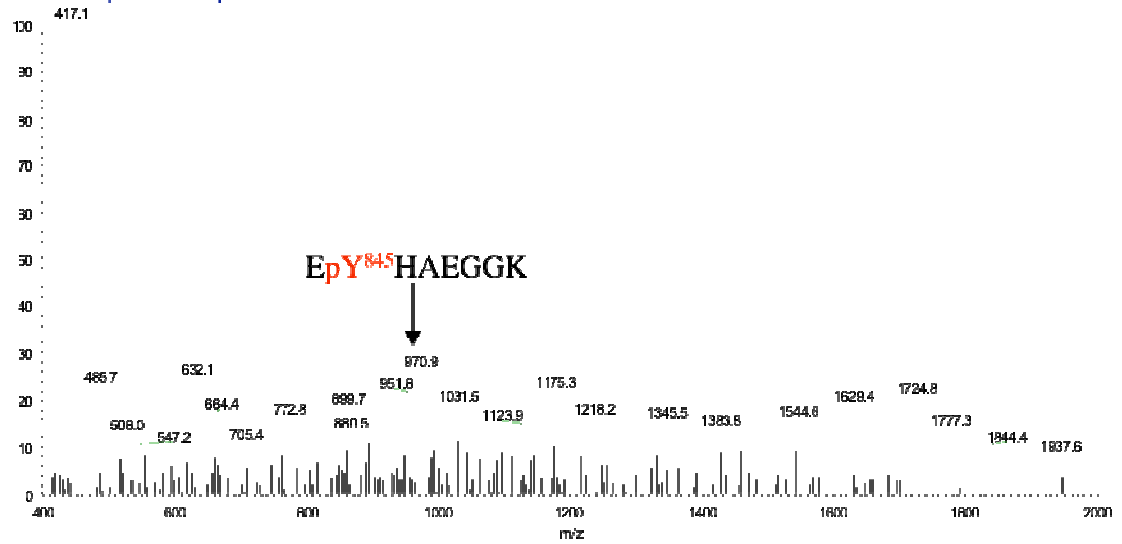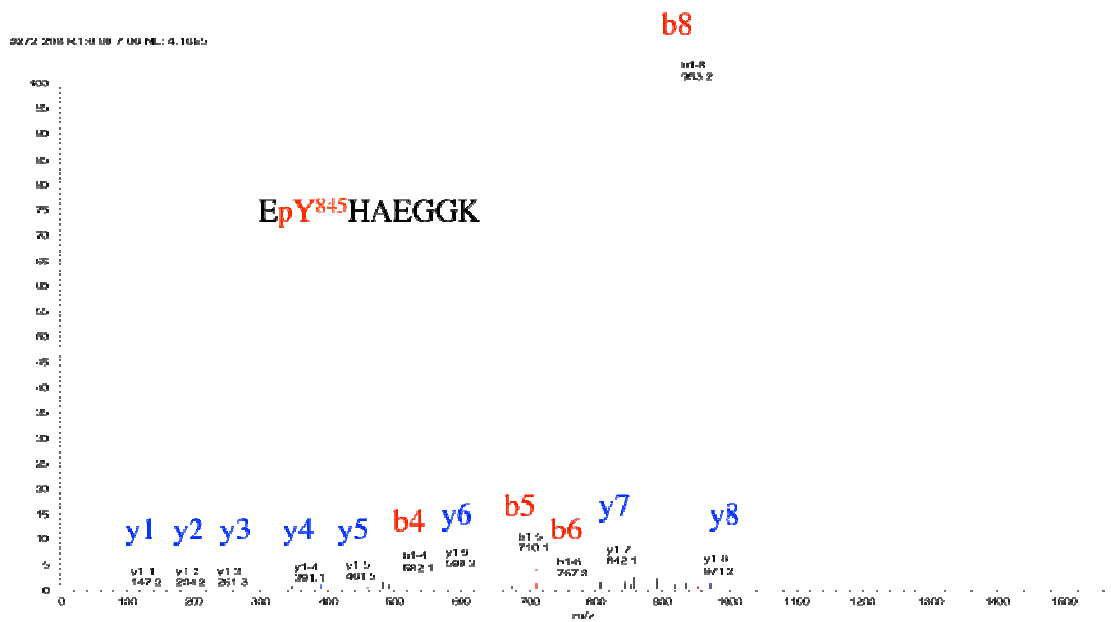

Supplement: NIHMS385772-supplement-1_si_001.pdf [file NIHMS385772-supplement-1_si_001.pdf]
